# Supplementary material for: Structural and Functional Properties Changes of β-Conglycinin Exposed to Hydroxyl Radical-Generating Systems
Source: PubMed Central journal article supplement (PMC6150227; doi:10.3390/molecules22111893), 2017-11-03
Supplement: molecules-22-01893-s001.pdf [file molecules-22-01893-s001.pdf]

**Table.1. Changes in protein carbonyls**

| H <sub>2</sub> O <sub>2</sub> (mmol/L) | Carbonyls (nmol/mg) |       |       |
|----------------------------------------|---------------------|-------|-------|
| 0                                      | 7.92                | 7.79  | 8.35  |
| 0.1                                    | 8.19                | 7.96  | 8.28  |
| 0.5                                    | 8.10                | 8.29  | 8.65  |
| 1                                      | 9.09                | 8.99  | 9.47  |
| 5                                      | 10.89               | 11.15 | 10.78 |
| 10                                     | 13.64               | 14.01 | 13.55 |
| 15                                     | 14.38               | 14.66 | 14.32 |

**Table.2. Changes in protein histidine**

| H <sub>2</sub> O <sub>2</sub> (mmol/L) | Histidine (g/100g) |      |      |
|----------------------------------------|--------------------|------|------|
| 0                                      | 1.17               | 1.16 | 1.17 |
| 0.1                                    | 1.18               | 1.16 | 1.14 |
| 0.5                                    | 1.17               | 1.15 | 1.14 |
| 1                                      | 1.14               | 1.13 | 1.13 |
| 5                                      | 1.12               | 1.10 | 1.09 |
| 10                                     | 1.11               | 1.09 | 1.05 |
| 15                                     | 1.05               | 1.04 | 1.04 |

**Table.3. Changes in protein lysine**

| H <sub>2</sub> O <sub>2</sub> (mmol/L) | Lysine (g/100g) |      |      |
|----------------------------------------|-----------------|------|------|
| 0                                      | 2.90            | 2.93 | 2.91 |
| 0.1                                    | 2.86            | 2.92 | 2.90 |
| 0.5                                    | 2.79            | 2.84 | 2.83 |
| 1                                      | 2.76            | 2.81 | 2.80 |
| 5                                      | 2.69            | 2.73 | 2.72 |
| 10                                     | 2.58            | 2.66 | 2.63 |
| 15                                     | 2.51            | 2.57 | 2.54 |

**Table.4. Changes in protein available lysine**

| H <sub>2</sub> O <sub>2</sub> (mmol/L) | Available lysine (g/100g) |      |      |
|----------------------------------------|---------------------------|------|------|
| 0                                      | 6.17                      | 6.21 | 6.32 |
| 0.1                                    | 5.89                      | 5.94 | 6.04 |
| 0.5                                    | 5.31                      | 5.42 | 5.59 |
| 1                                      | 5.16                      | 4.94 | 5.09 |
| 5                                      | 4.22                      | 4.48 | 4.17 |
| 10                                     | 4.08                      | 4.15 | 4.03 |
| 15                                     | 3.72                      | 3.79 | 3.54 |

**Table.5. Changes in protein free SH**

| H <sub>2</sub> O <sub>2</sub> (mmol/L) | Free SH (nmol/mg) |      |      |
|----------------------------------------|-------------------|------|------|
| 0                                      | 8.62              | 8.69 | 8.67 |
| 0.1                                    | 8.58              | 8.59 | 8.58 |
| 0.5                                    | 7.40              | 7.45 | 7.41 |
| 1                                      | 5.17              | 5.20 | 5.17 |
| 5                                      | 1.36              | 1.32 | 1.41 |
| 10                                     | 1.06              | 0.94 | 1.04 |
| 15                                     | 0.96              | 0.91 | 0.99 |

**Table.6. Changes in protein disulfide groups**

| H <sub>2</sub> O <sub>2</sub> (mmol/L) | Disulfide groups (nmol/mg) |       |       |
|----------------------------------------|----------------------------|-------|-------|
| 0                                      | 85.39                      | 86.88 | 82.40 |
| 0.1                                    | 84.99                      | 80.34 | 78.94 |
| 0.5                                    | 77.38                      | 80.89 | 79.48 |
| 1                                      | 84.84                      | 89.00 | 91.49 |
| 5                                      | 85.50                      | 89.71 | 92.19 |
| 10                                     | 95.29                      | 93.82 | 96.44 |
| 15                                     | 99.63                      | 93.25 | 95.85 |

**Table.7. Changes in protein secondary structures ( $\alpha$ -helix and  $\beta$ -sheet)**

| H <sub>2</sub> O <sub>2</sub> (mmol/L) | $\alpha$ -helix (%) |       |       | $\beta$ -sheet (%) |       |       |
|----------------------------------------|---------------------|-------|-------|--------------------|-------|-------|
| 0                                      | 16.04               | 16.04 | 16.4  | 40.91              | 40.53 | 40.78 |
| 0.1                                    | 15.71               | 15.71 | 16.08 | 41.02              | 40.77 | 40.89 |
| 0.5                                    | 15.92               | 15.92 | 16.25 | 39.52              | 39.83 | 39.4  |
| 1                                      | 15.51               | 15.51 | 15.91 | 39.05              | 39.24 | 39.35 |
| 5                                      | 15.73               | 15.73 | 16.01 | 38.93              | 38.51 | 38.63 |
| 10                                     | 15.36               | 15.36 | 15.65 | 37.81              | 38.05 | 37.93 |
| 15                                     | 15.26               | 15.26 | 15.55 | 38.09              | 37.96 | 37.8  |

**Table.8. Changes in protein secondary structures ( $\beta$ -turn and Random coil)**

| H <sub>2</sub> O <sub>2</sub> (mmol/L) | $\beta$ -turn (%) |       |       | Random coil (%) |       |       |
|----------------------------------------|-------------------|-------|-------|-----------------|-------|-------|
| 0                                      | 26.62             | 26.36 | 26.71 | 16.46           | 16.41 | 16.63 |
| 0.1                                    | 26.57             | 26.23 | 26.38 | 16.98           | 16.71 | 16.81 |
| 0.5                                    | 27.71             | 27.28 | 27.43 | 16.97           | 16.61 | 17.07 |
| 1                                      | 27.77             | 27.55 | 27.61 | 17.6            | 17.27 | 17.44 |
| 5                                      | 28.21             | 27.99 | 27.92 | 17.54           | 17.42 | 17.30 |
| 10                                     | 28.10             | 28.32 | 28.25 | 18.59           | 18.21 | 18.31 |
| 15                                     | 27.99             | 28.34 | 28.27 | 18.48           | 18.61 | 18.30 |

**Table.9. Changes in protein surface hydrophobicity**

| H <sub>2</sub> O <sub>2</sub> (mmol/L) | Surface hydrophobicity ( $H_0$ ) |         |         |
|----------------------------------------|----------------------------------|---------|---------|
| 0                                      | 1977.5                           | 1880.91 | 1922.62 |
| 0.1                                    | 1872.25                          | 1899.8  | 1792.71 |
| 0.5                                    | 1853.57                          | 1782.19 | 1802.13 |
| 1                                      | 1863.76                          | 1754.58 | 1793.49 |
| 5                                      | 2025.04                          | 1901.41 | 1966.81 |
| 10                                     | 2134.19                          | 2191.45 | 2272.95 |
| 15                                     | 2404.37                          | 2321.15 | 2249.07 |

**Table.10. Changes in protein fluorescence intensity**

| Wavelength(nm) | 0        | 0.1      | 0.5      | 1        | 5        | 10       | 15       |
|----------------|----------|----------|----------|----------|----------|----------|----------|
| 300            | 22.09505 | 19.27913 | 15.84474 | 17.77913 | 14.41435 | 16.58825 | 20.52687 |
| 300.5          | 22.97402 | 20.02066 | 16.71267 | 18.52066 | 15.01992 | 17.46174 | 21.21948 |
| 301            | 23.83851 | 20.76567 | 17.52177 | 19.26567 | 15.51461 | 18.33317 | 21.99489 |
| 301.5          | 24.71571 | 21.4903  | 18.28314 | 19.9903  | 16.12561 | 19.21258 | 22.75658 |
| 302            | 25.61159 | 22.19662 | 19.09409 | 20.69662 | 17.001   | 20.08422 | 23.48371 |
| 302.5          | 26.5048  | 22.88663 | 19.9522  | 21.38663 | 17.1656  | 20.92755 | 24.18988 |
| 303            | 27.38048 | 23.58032 | 20.87125 | 22.08032 | 17.91338 | 21.74876 | 24.91418 |
| 303.5          | 28.23429 | 24.29093 | 21.7093  | 22.79093 | 18.61539 | 22.56007 | 25.64237 |
| 304            | 29.0981  | 25.00696 | 22.40369 | 23.50696 | 19.2316  | 23.36067 | 26.36538 |
| 304.5          | 30.0061  | 25.71996 | 22.99283 | 24.21996 | 19.9144  | 24.14641 | 27.0658  |
| 305            | 30.93367 | 26.41699 | 23.68253 | 24.91699 | 20.66313 | 24.92492 | 27.78933 |
| 305.5          | 31.84551 | 27.11104 | 24.50253 | 25.61104 | 21.22627 | 25.71794 | 28.52196 |
| 306            | 32.71855 | 27.77378 | 25.39065 | 26.27378 | 22.02018 | 26.51624 | 29.26743 |
| 306.5          | 33.59869 | 28.43963 | 26.24049 | 26.93963 | 22.73964 | 27.31841 | 29.9698  |
| 307            | 34.50798 | 29.14023 | 27.07771 | 27.64023 | 23.48609 | 28.09576 | 30.6378  |
| 307.5          | 35.44335 | 29.86909 | 27.92132 | 28.36909 | 24.11204 | 28.8972  | 31.2505  |
| 308            | 36.36109 | 30.59674 | 28.77162 | 29.09674 | 24.86238 | 29.73645 | 31.85486 |
| 308.5          | 37.23218 | 31.31433 | 29.60887 | 29.81433 | 25.64474 | 30.61611 | 32.47549 |
| 309            | 38.07788 | 32.06669 | 30.40537 | 30.56669 | 26.47901 | 31.46808 | 33.14031 |
| 309.5          | 38.95473 | 32.85081 | 31.17828 | 31.35081 | 27.31519 | 32.29331 | 33.8426  |
| 310            | 39.90439 | 33.65865 | 31.94933 | 32.15865 | 28.10917 | 33.08177 | 34.56359 |
| 310.5          | 40.86286 | 34.45152 | 32.74621 | 32.95152 | 28.89295 | 33.86399 | 35.22854 |

---

|       |          |          |          |          |          |          |          |
|-------|----------|----------|----------|----------|----------|----------|----------|
| 311   | 41.76499 | 35.23175 | 33.54374 | 33.73175 | 29.6868  | 34.61394 | 35.91579 |
| 311.5 | 42.60043 | 35.99356 | 34.32382 | 34.49356 | 30.57354 | 35.33924 | 36.70591 |
| 312   | 43.46109 | 36.77964 | 35.09911 | 35.27964 | 31.42298 | 36.05339 | 37.6467  |
| 312.5 | 44.39384 | 37.60784 | 35.94134 | 36.10784 | 32.24671 | 36.79098 | 38.57976 |
| 313   | 45.40609 | 38.46286 | 36.83472 | 36.96286 | 33.08212 | 37.55526 | 39.43184 |
| 313.5 | 46.42049 | 39.30856 | 37.71504 | 37.80856 | 33.84563 | 38.35524 | 40.19459 |
| 314   | 47.41255 | 40.11407 | 38.5132  | 38.61407 | 34.52612 | 39.21583 | 40.97253 |
| 314.5 | 48.35377 | 40.90858 | 39.29213 | 39.40858 | 35.19764 | 40.14236 | 41.74828 |
| 315   | 49.36562 | 41.71624 | 40.10745 | 40.21624 | 35.9981  | 41.03803 | 42.54548 |
| 315.5 | 50.37552 | 42.55629 | 40.97138 | 41.05629 | 36.89967 | 41.85966 | 43.31036 |
| 316   | 51.40643 | 43.39043 | 41.85571 | 41.89043 | 37.81255 | 42.64413 | 44.03321 |
| 316.5 | 52.46405 | 44.51575 | 42.6733  | 42.71575 | 38.6825  | 43.46891 | 44.73034 |
| 317   | 53.53047 | 45.5515  | 43.38738 | 43.5215  | 39.52954 | 44.32311 | 45.52464 |
| 317.5 | 54.57862 | 46.5186  | 44.0587  | 44.3186  | 40.38516 | 45.17631 | 46.41827 |
| 318   | 55.59117 | 47.26637 | 44.834   | 45.06637 | 41.24093 | 46.02307 | 47.37563 |
| 318.5 | 56.5977  | 47.98654 | 45.72849 | 45.78654 | 42.13717 | 46.89876 | 48.31527 |
| 319   | 57.59194 | 48.74496 | 46.69114 | 46.54496 | 43.06744 | 47.766   | 49.27622 |
| 319.5 | 58.57445 | 49.60856 | 47.66699 | 47.40856 | 44.02753 | 48.61436 | 50.24953 |
| 320   | 59.54126 | 50.54884 | 48.68081 | 48.34884 | 44.99189 | 49.42496 | 51.21696 |
| 320.5 | 60.52974 | 51.49442 | 49.69912 | 49.29442 | 45.95034 | 50.22302 | 52.16997 |
| 321   | 61.51817 | 52.40993 | 50.69154 | 50.20993 | 46.89019 | 51.00367 | 53.13623 |
| 321.5 | 62.5068  | 53.32494 | 51.68492 | 51.12494 | 47.75835 | 51.79    | 54.15035 |
| 322   | 63.4852  | 54.24323 | 52.70073 | 52.04323 | 48.65717 | 52.59112 | 55.18    |
| 322.5 | 64.50066 | 55.17096 | 53.73736 | 52.97096 | 49.64259 | 53.4428  | 56.20144 |
| 323   | 65.52515 | 56.1023  | 54.76206 | 53.9023  | 50.76211 | 54.33819 | 57.18985 |
| 323.5 | 66.54834 | 57.05982 | 55.72966 | 54.85982 | 51.87191 | 55.34014 | 58.15184 |
| 324   | 67.51998 | 58.02008 | 56.63414 | 55.82008 | 52.9369  | 56.44238 | 59.12908 |
| 324.5 | 68.49035 | 58.97068 | 57.54735 | 56.77068 | 53.9578  | 57.56484 | 60.06532 |
| 325   | 69.45684 | 59.92768 | 58.52327 | 57.72768 | 55.00904 | 58.58831 | 60.95461 |
| 325.5 | 70.45048 | 60.89976 | 59.56409 | 58.69976 | 56.081   | 59.42185 | 61.81473 |
| 326   | 71.44046 | 61.89352 | 60.6211  | 59.69352 | 57.1654  | 60.31025 | 62.76606 |
| 326.5 | 72.42819 | 62.88883 | 61.68005 | 60.68883 | 58.24276 | 60.94634 | 63.80581 |
| 327   | 73.38162 | 63.90644 | 62.74021 | 61.70644 | 59.30758 | 61.68653 | 64.92667 |
| 327.5 | 74.32838 | 64.94336 | 63.78161 | 62.74336 | 60.36866 | 62.4906  | 66.04581 |
| 328   | 75.30832 | 65.99593 | 64.79389 | 63.79593 | 61.43891 | 63.29998 | 67.14686 |
| 328.5 | 76.35528 | 67.02418 | 65.75421 | 64.82418 | 62.50593 | 64.13367 | 67.94555 |
| 329   | 77.09495 | 67.50517 | 66.26139 | 65.30517 | 63.09243 | 64.99287 | 68.59199 |
| 329.5 | 77.5796  | 67.86362 | 66.70013 | 65.66362 | 63.54837 | 65.59964 | 69.2232  |
| 330   | 77.98841 | 68.25296 | 67.22848 | 66.05296 | 63.98438 | 66.48934 | 69.76567 |
| 330.5 | 78.34114 | 68.6843  | 67.6869  | 66.4843  | 64.36809 | 67.07414 | 70.17594 |
| 331   | 78.65546 | 69.07835 | 68.09487 | 66.87835 | 64.72446 | 67.66594 | 70.64175 |
| 331.5 | 78.97064 | 69.44493 | 68.46086 | 67.24493 | 65.08833 | 68.05883 | 71.25989 |
| 332   | 79.30616 | 69.77034 | 68.84614 | 67.57034 | 65.43127 | 68.58936 | 71.57301 |
| 332.5 | 79.64315 | 70.0692  | 69.16273 | 67.8692  | 65.71625 | 68.97018 | 71.82006 |

---

---

|       |          |          |          |          |          |          |          |
|-------|----------|----------|----------|----------|----------|----------|----------|
| 333   | 79.92626 | 70.35049 | 69.40476 | 68.15049 | 65.96289 | 69.31113 | 72.0376  |
| 333.5 | 80.13829 | 70.62993 | 69.63533 | 68.42993 | 66.24108 | 69.68627 | 72.27774 |
| 334   | 80.35945 | 70.91953 | 69.91964 | 68.71953 | 66.54568 | 69.95863 | 72.6097  |
| 334.5 | 80.62323 | 71.18729 | 70.26152 | 68.98729 | 66.81579 | 70.13616 | 72.97431 |
| 335   | 80.9186  | 71.45464 | 70.54842 | 69.25464 | 67.03137 | 70.57492 | 73.3168  |
| 335.5 | 81.14344 | 71.70071 | 70.76026 | 69.50071 | 67.22265 | 70.84471 | 73.49476 |
| 336   | 81.32603 | 71.93473 | 70.89478 | 69.73473 | 67.36456 | 71.04771 | 73.64444 |
| 336.5 | 81.48976 | 72.15926 | 71.04173 | 69.95926 | 67.48965 | 71.26633 | 73.91879 |
| 337   | 81.69181 | 72.37973 | 71.17142 | 70.17973 | 67.61032 | 71.49085 | 74.10318 |
| 337.5 | 81.88865 | 72.56612 | 71.28451 | 70.36612 | 67.69988 | 71.55628 | 74.26551 |
| 338   | 82.0284  | 72.68713 | 71.32019 | 70.48713 | 67.7903  | 71.62094 | 74.45756 |
| 338.5 | 82.07742 | 72.74542 | 71.36094 | 70.54542 | 67.87873 | 71.7315  | 74.56762 |
| 339   | 82.08462 | 72.75815 | 71.39703 | 70.55815 | 67.94396 | 71.83212 | 74.76547 |
| 339.5 | 82.10379 | 72.76741 | 71.48233 | 70.56741 | 68.01535 | 71.9191  | 74.84957 |
| 340   | 82.12585 | 72.76899 | 71.51405 | 70.56899 | 68.09848 | 71.9482  | 74.92861 |
| 340.5 | 82.10415 | 72.74816 | 71.47185 | 70.54816 | 68.15078 | 71.99744 | 75.01049 |
| 341   | 82.00477 | 72.69144 | 71.43566 | 70.49144 | 68.27976 | 72.00209 | 75.04483 |
| 341.5 | 81.88129 | 72.59286 | 71.35199 | 70.39286 | 68.35818 | 72.01325 | 75.08334 |
| 342   | 81.75749 | 72.47376 | 71.29409 | 70.27376 | 68.46101 | 72.02069 | 75.10161 |
| 342.5 | 81.61871 | 72.35463 | 71.24901 | 70.15463 | 68.45125 | 72.06707 | 75.12615 |
| 343   | 81.43421 | 72.26677 | 71.20883 | 70.06677 | 68.40163 | 71.98376 | 75.14841 |
| 343.5 | 81.24343 | 72.21905 | 71.15528 | 70.01905 | 68.33449 | 71.9024  | 75.15914 |
| 344   | 81.05944 | 72.17727 | 71.08506 | 69.97727 | 68.2689  | 71.85715 | 75.06473 |
| 344.5 | 80.89026 | 72.08932 | 70.90051 | 69.88932 | 68.20264 | 71.53871 | 74.93639 |
| 345   | 80.71064 | 71.92335 | 70.78249 | 69.72335 | 68.16069 | 71.33655 | 74.78386 |
| 345.5 | 80.45865 | 71.72022 | 70.69904 | 69.52022 | 68.03167 | 71.13625 | 74.65021 |
| 346   | 80.12426 | 71.5216  | 70.5761  | 69.3216  | 67.94025 | 70.86594 | 74.44436 |
| 346.5 | 79.75597 | 71.34872 | 70.44953 | 69.14872 | 67.83456 | 70.59922 | 74.1962  |
| 347   | 79.47981 | 71.13097 | 70.26335 | 68.93097 | 67.70902 | 70.18041 | 73.90696 |
| 347.5 | 79.27285 | 70.86905 | 70.01785 | 68.66905 | 67.53118 | 69.79763 | 73.57681 |
| 348   | 79.07725 | 70.57193 | 69.74553 | 68.37193 | 67.35456 | 69.5208  | 73.21346 |
| 348.5 | 78.83401 | 70.27124 | 69.48885 | 68.07124 | 67.21644 | 69.26508 | 72.86038 |
| 349   | 78.58812 | 69.9321  | 69.26884 | 67.7321  | 67.03494 | 69.02232 | 72.51371 |
| 349.5 | 78.2989  | 69.58011 | 69.09068 | 67.38011 | 66.87345 | 68.78973 | 72.10857 |
| 350   | 77.93837 | 69.25441 | 68.9207  | 67.05441 | 66.66079 | 68.47238 | 71.68753 |
| 350.5 | 77.51859 | 68.95622 | 68.7124  | 66.75622 | 66.37861 | 68.09867 | 71.30631 |
| 351   | 77.08894 | 68.62403 | 68.45456 | 66.42403 | 66.0412  | 67.67107 | 71.00111 |
| 351.5 | 76.69403 | 68.23529 | 68.15645 | 66.03529 | 65.65704 | 67.29765 | 70.62005 |
| 352   | 76.32359 | 67.81159 | 67.82287 | 65.61159 | 65.26991 | 66.98516 | 70.13065 |
| 352.5 | 75.96651 | 67.36667 | 67.44499 | 65.16667 | 64.87534 | 66.70179 | 69.54388 |
| 353   | 75.58263 | 66.22569 | 67.03478 | 64.72569 | 64.47651 | 66.37093 | 68.9785  |
| 353.5 | 75.16515 | 65.80951 | 66.61371 | 64.30951 | 64.04156 | 65.9989  | 68.41475 |
| 354   | 74.70586 | 65.44195 | 66.17716 | 63.94195 | 63.56407 | 65.62578 | 67.86159 |
| 354.5 | 74.20357 | 65.1014  | 65.72104 | 63.6014  | 63.04307 | 65.30132 | 67.3175  |

---

---

|       |          |          |          |          |          |          |          |
|-------|----------|----------|----------|----------|----------|----------|----------|
| 355   | 73.67583 | 64.70044 | 65.2858  | 63.20044 | 62.53951 | 64.98784 | 66.76582 |
| 355.5 | 73.15576 | 64.21402 | 64.88973 | 62.71402 | 62.00475 | 64.59847 | 66.20027 |
| 356   | 72.66808 | 63.64709 | 64.51595 | 62.14709 | 61.40444 | 64.11555 | 65.61196 |
| 356.5 | 72.21401 | 63.07779 | 64.08259 | 61.57779 | 60.74842 | 63.62849 | 65.00674 |
| 357   | 71.76555 | 62.51869 | 63.57392 | 61.01869 | 60.1643  | 63.20741 | 64.37533 |
| 357.5 | 71.25365 | 61.97221 | 63.00963 | 60.47221 | 59.66103 | 62.8529  | 63.71958 |
| 358   | 70.70878 | 61.42797 | 62.4529  | 59.92797 | 59.19756 | 62.47409 | 63.1214  |
| 358.5 | 70.17343 | 60.92838 | 61.92567 | 59.42838 | 58.69351 | 62.02055 | 62.60255 |
| 359   | 69.67522 | 60.47614 | 61.4292  | 58.97614 | 58.15468 | 61.50828 | 62.11496 |
| 359.5 | 69.13275 | 60.01846 | 60.91097 | 58.51846 | 57.59332 | 61.00944 | 61.56289 |
| 360   | 68.54226 | 59.51721 | 60.33613 | 58.01721 | 57.05754 | 60.60313 | 60.96539 |
| 360.5 | 67.90077 | 58.98222 | 59.72813 | 57.48222 | 56.58479 | 60.231   | 60.34192 |
| 361   | 67.27727 | 58.4797  | 59.11044 | 56.9797  | 56.11674 | 59.82579 | 59.73455 |
| 361.5 | 66.63366 | 58.01387 | 58.5255  | 56.51387 | 55.58675 | 59.37019 | 59.15409 |
| 362   | 65.995   | 57.53573 | 57.95907 | 56.03573 | 54.97703 | 58.901   | 58.59057 |
| 362.5 | 65.33716 | 57.01959 | 57.4492  | 55.51959 | 54.36886 | 58.41167 | 57.9942  |
| 363   | 64.6613  | 56.48959 | 56.93978 | 54.98959 | 53.81645 | 57.91643 | 57.32504 |
| 363.5 | 63.96702 | 55.96556 | 56.38729 | 54.46556 | 53.32678 | 57.40974 | 56.64421 |
| 364   | 63.26573 | 55.43989 | 55.76336 | 53.93989 | 52.79246 | 56.915   | 56.01126 |
| 364.5 | 62.58336 | 54.9092  | 55.14195 | 53.4092  | 52.29048 | 56.40537 | 55.44639 |
| 365   | 61.89861 | 54.37933 | 54.56742 | 52.87933 | 51.89067 | 55.85925 | 54.92606 |
| 365.5 | 61.23182 | 53.85481 | 54.01065 | 52.35481 | 51.6161  | 55.30414 | 54.44533 |
| 366   | 60.54761 | 53.32977 | 53.45425 | 51.82977 | 51.28049 | 54.76907 | 53.97133 |
| 366.5 | 59.9024  | 52.82415 | 52.89864 | 51.32415 | 50.86508 | 54.26947 | 53.49175 |
| 367   | 59.28545 | 52.37389 | 52.36119 | 50.87389 | 50.42426 | 53.78095 | 53.01452 |
| 367.5 | 58.70894 | 51.99722 | 51.80471 | 50.49722 | 50.04824 | 53.29164 | 52.56243 |
| 368   | 58.12343 | 51.56307 | 51.19922 | 50.06307 | 49.67438 | 52.78238 | 52.12389 |
| 368.5 | 57.56293 | 51.00774 | 50.6337  | 49.50774 | 49.29724 | 52.26563 | 51.68173 |
| 369   | 57.00347 | 50.35946 | 50.16514 | 48.85946 | 48.94509 | 51.73489 | 51.2236  |
| 369.5 | 56.44375 | 49.81972 | 49.80518 | 48.31972 | 48.60338 | 51.20578 | 50.73117 |
| 370   | 55.86717 | 49.41393 | 49.41233 | 47.91393 | 48.22729 | 50.68841 | 50.22006 |
| 370.5 | 55.28374 | 49.09602 | 48.98327 | 47.59602 | 47.79469 | 50.1821  | 49.71625 |
| 371   | 54.74803 | 48.7338  | 48.49396 | 47.2338  | 47.2977  | 49.65555 | 49.26773 |
| 371.5 | 54.27211 | 48.35797 | 48.03378 | 46.85797 | 46.76022 | 49.06933 | 48.85958 |
| 372   | 53.8623  | 47.98195 | 47.60489 | 46.48195 | 46.22202 | 48.49257 | 48.46825 |
| 372.5 | 53.43466 | 47.6492  | 47.24288 | 46.1492  | 45.74171 | 48.02818 | 48.06802 |
| 373   | 52.99514 | 47.32772 | 46.9188  | 45.82772 | 45.34753 | 47.68345 | 47.66075 |
| 373.5 | 52.51088 | 47.00204 | 46.58733 | 45.50204 | 45.00433 | 47.32737 | 47.24827 |
| 374   | 52.01817 | 46.65721 | 46.22478 | 45.15721 | 44.6401  | 46.83702 | 46.81919 |
| 374.5 | 51.4636  | 46.31108 | 45.84121 | 44.81108 | 44.19892 | 46.22824 | 46.38451 |
| 375   | 50.936   | 45.94224 | 45.43408 | 44.44224 | 43.71892 | 45.55493 | 45.96557 |
| 375.5 | 50.46275 | 45.54364 | 45.00241 | 44.04364 | 43.22791 | 44.95376 | 45.57885 |
| 376   | 50.05192 | 45.12173 | 44.56823 | 43.62173 | 42.77531 | 44.46558 | 45.20148 |
| 376.5 | 49.63668 | 44.70869 | 44.1517  | 43.20869 | 42.29482 | 44.09768 | 44.80338 |

---



---

|       |          |          |          |          |          |          |          |
|-------|----------|----------|----------|----------|----------|----------|----------|
| 377   | 49.22165 | 44.30864 | 43.73155 | 42.80864 | 41.81041 | 43.68317 | 44.41198 |
| 377.5 | 48.80461 | 43.92904 | 43.28671 | 42.42904 | 41.3235  | 43.21709 | 44.04275 |
| 378   | 48.38855 | 43.5707  | 42.82451 | 42.0707  | 40.86241 | 42.66256 | 43.66709 |
| 378.5 | 47.96004 | 41.37591 | 42.39967 | 41.70879 | 40.37087 | 42.03442 | 43.22258 |
| 379   | 47.5232  | 40.8962  | 41.99333 | 41.29364 | 39.84391 | 41.31574 | 42.74863 |
| 379.5 | 47.09184 | 40.41227 | 41.57592 | 40.81459 | 39.32243 | 40.64378 | 42.30482 |
| 380   | 46.67782 | 39.93978 | 41.11333 | 40.3099  | 38.8299  | 40.09525 | 41.9095  |
| 380.5 | 46.29191 | 39.45646 | 40.61944 | 39.8283  | 38.29258 | 39.71182 | 41.44124 |
| 381   | 45.90798 | 38.94149 | 40.09317 | 39.37586 | 37.76222 | 39.41914 | 40.85882 |
| 381.5 | 45.50446 | 38.41401 | 39.56343 | 38.93663 | 37.32853 | 39.16748 | 40.22957 |
| 382   | 45.05768 | 37.92933 | 39.03864 | 38.48542 | 37.00497 | 38.87748 | 39.69547 |
| 382.5 | 44.58211 | 37.49047 | 38.54398 | 38.03361 | 36.63174 | 38.53033 | 39.2649  |
| 383   | 44.09406 | 37.04174 | 38.07034 | 37.60893 | 36.16225 | 38.14374 | 38.87436 |
| 383.5 | 43.5841  | 36.53305 | 37.61795 | 37.2052  | 35.65509 | 37.76767 | 38.46434 |
| 384   | 43.03262 | 35.9658  | 37.17261 | 36.77823 | 35.20558 | 37.40234 | 38.06808 |
| 384.5 | 42.45784 | 35.39779 | 36.70009 | 36.28868 | 34.76612 | 37.02995 | 37.69659 |
| 385   | 41.89478 | 34.85733 | 36.18373 | 35.77418 | 34.31592 | 36.62902 | 37.31274 |
| 385.5 | 41.35141 | 34.35912 | 35.65504 | 35.28563 | 33.85279 | 36.17683 | 36.88829 |
| 386   | 40.80836 | 33.87255 | 35.15465 | 34.8119  | 33.37865 | 35.71339 | 36.42952 |
| 386.5 | 40.24089 | 33.37596 | 34.69156 | 34.29507 | 32.89795 | 35.2494  | 35.96299 |
| 387   | 39.66475 | 32.83918 | 34.22159 | 33.71536 | 32.42555 | 34.78101 | 35.48497 |
| 387.5 | 39.0823  | 32.27022 | 33.71659 | 33.1227  | 31.96661 | 34.3118  | 34.9818  |
| 388   | 38.51165 | 31.70423 | 33.16519 | 32.54806 | 31.5204  | 33.86927 | 34.45753 |
| 388.5 | 37.97968 | 31.16533 | 32.63404 | 31.98447 | 31.07176 | 33.43187 | 33.92158 |
| 389   | 37.49643 | 30.66859 | 32.14291 | 31.39167 | 30.62947 | 32.95483 | 33.38992 |
| 389.5 | 37.04058 | 30.1856  | 31.69886 | 30.78557 | 30.2066  | 32.42657 | 32.87161 |
| 390   | 36.54601 | 29.7213  | 31.22705 | 30.20299 | 29.80077 | 31.89045 | 32.36791 |
| 390.5 | 35.99127 | 29.24401 | 30.70806 | 29.66247 | 29.38427 | 31.38767 | 31.84348 |
| 391   | 35.39537 | 28.76872 | 30.16101 | 29.14293 | 28.94456 | 30.91795 | 31.27802 |
| 391.5 | 34.83918 | 28.29893 | 29.65424 | 28.62733 | 28.51188 | 30.4813  | 30.6996  |
| 392   | 34.30776 | 27.85597 | 29.18663 | 28.1076  | 28.10178 | 30.05859 | 30.1547  |
| 392.5 | 33.77904 | 27.40741 | 28.72316 | 27.57252 | 27.71063 | 29.62876 | 29.64653 |
| 393   | 33.22119 | 26.93771 | 28.22003 | 26.98654 | 27.29361 | 29.15352 | 29.15485 |
| 393.5 | 32.67539 | 26.45431 | 27.69255 | 26.44892 | 26.84205 | 28.67506 | 28.65322 |
| 394   | 32.12228 | 25.98768 | 27.18179 | 26.03907 | 26.35387 | 28.14094 | 28.16465 |
| 394.5 | 31.56847 | 25.5644  | 26.72328 | 25.77414 | 25.85556 | 27.55656 | 27.69679 |
| 395   | 31.00697 | 25.18183 | 26.2913  | 25.49978 | 25.36165 | 26.94232 | 27.26166 |
| 395.5 | 30.45711 | 24.83194 | 25.87119 | 25.16296 | 24.90161 | 26.42156 | 26.83007 |
| 396   | 29.90854 | 24.49673 | 25.44795 | 24.77227 | 24.46525 | 25.98423 | 26.39828 |
| 396.5 | 29.38226 | 24.16407 | 25.05489 | 24.41056 | 24.07584 | 25.5934  | 25.9583  |
| 397   | 28.89081 | 23.812   | 24.69003 | 24.05714 | 23.72716 | 25.17529 | 25.53022 |
| 397.5 | 28.43941 | 23.44748 | 24.32996 | 23.6956  | 23.40336 | 24.77138 | 25.10806 |
| 398   | 27.99564 | 23.07743 | 23.9491  | 23.31823 | 23.05269 | 24.36362 | 24.69566 |
| 398.5 | 27.52969 | 22.72015 | 23.558   | 22.93999 | 22.66036 | 23.93398 | 24.2981  |

---

---

|       |          |          |          |          |          |          |          |
|-------|----------|----------|----------|----------|----------|----------|----------|
| 399   | 27.0573  | 22.3779  | 23.18635 | 22.57012 | 22.26042 | 23.46675 | 23.91052 |
| 399.5 | 26.58665 | 22.06668 | 22.83253 | 22.21028 | 21.90441 | 22.99301 | 23.53596 |
| 400   | 26.15079 | 21.79241 | 22.4857  | 21.85557 | 21.59583 | 22.52658 | 23.17069 |
| 400.5 | 25.72237 | 21.54218 | 22.13538 | 21.51564 | 21.29558 | 22.08268 | 22.81795 |
| 401   | 25.30796 | 21.27272 | 21.79826 | 21.18655 | 20.97893 | 21.65112 | 22.45287 |
| 401.5 | 24.90494 | 20.98521 | 21.47203 | 20.86425 | 20.65129 | 21.25182 | 22.07281 |
| 402   | 24.54567 | 20.69989 | 21.13947 | 20.54172 | 20.3509  | 20.88171 | 21.68534 |
| 402.5 | 24.17129 | 20.43194 | 20.80802 | 20.22711 | 20.07158 | 20.53569 | 21.29516 |
| 403   | 23.77007 | 20.17444 | 20.50381 | 19.91267 | 19.79423 | 20.14456 | 20.89853 |
| 403.5 | 23.3691  | 19.9212  | 20.24536 | 19.60604 | 19.5006  | 19.75439 | 20.51235 |
| 404   | 23.0187  | 19.67045 | 19.99452 | 19.31659 | 19.21726 | 19.48067 | 20.15876 |
| 404.5 | 22.70766 | 19.43013 | 19.72831 | 19.05761 | 18.95858 | 19.40622 | 19.83215 |
| 405   | 22.39011 | 19.19704 | 19.44717 | 18.81775 | 18.72056 | 19.4077  | 19.50605 |
| 405.5 | 22.06873 | 18.9712  | 19.18243 | 18.59731 | 18.48405 | 19.33288 | 19.13778 |
| 406   | 21.75814 | 18.76137 | 18.94203 | 18.39479 | 18.2739  | 19.12828 | 18.82547 |
| 406.5 | 21.47256 | 18.56958 | 18.72797 | 18.22052 | 18.0791  | 18.89964 | 18.63414 |
| 407   | 21.17499 | 18.38081 | 18.53546 | 18.05946 | 17.88497 | 18.70644 | 18.55197 |
| 407.5 | 20.86986 | 18.16293 | 18.3599  | 17.90802 | 17.66593 | 18.5365  | 18.4412  |
| 408   | 20.55339 | 17.90705 | 18.18771 | 17.76294 | 17.45192 | 18.3643  | 18.26767 |
| 408.5 | 20.25502 | 17.64226 | 18.01602 | 17.60982 | 17.26129 | 18.17515 | 18.07104 |
| 409   | 19.96566 | 17.40658 | 17.83793 | 17.43659 | 17.08436 | 17.98094 | 17.90308 |
| 409.5 | 19.6999  | 17.21083 | 17.66586 | 17.24254 | 16.90247 | 17.78492 | 17.72247 |
| 410   | 19.4584  | 17.04457 | 17.50611 | 17.06581 | 16.73096 | 17.6146  | 17.51578 |
| 410.5 | 19.24683 | 16.89216 | 17.36958 | 16.90726 | 16.57908 | 17.459   | 17.3163  |
| 411   | 19.0452  | 16.73366 | 17.22715 | 16.75232 | 16.44453 | 17.31245 | 17.12845 |
| 411.5 | 18.85387 | 16.57176 | 17.07087 | 16.59053 | 16.30492 | 17.12988 | 16.94845 |
| 412   | 18.67568 | 16.42207 | 16.90907 | 16.44056 | 16.16885 | 16.93527 | 16.77068 |
| 412.5 | 18.50421 | 16.30175 | 16.77552 | 16.31143 | 16.05164 | 16.74765 | 16.58649 |
| 413   | 18.33453 | 16.20153 | 16.65674 | 16.18544 | 15.96702 | 16.58231 | 16.40294 |
| 413.5 | 18.1703  | 16.09769 | 16.53607 | 16.05516 | 15.89173 | 16.40919 | 16.22712 |
| 414   | 18.00988 | 15.98324 | 16.39131 | 15.92316 | 15.81199 | 16.22381 | 16.08048 |
| 414.5 | 17.83545 | 15.85837 | 16.23931 | 15.80952 | 15.71118 | 16.05622 | 15.95619 |
| 415   | 17.64125 | 15.73792 | 16.08818 | 15.70752 | 15.60151 | 15.91477 | 15.84396 |
| 415.5 | 17.45214 | 15.62562 | 15.95798 | 15.60862 | 15.48532 | 15.80311 | 15.72237 |
| 416   | 17.29141 | 15.55795 | 15.84594 | 15.53292 | 15.44773 | 15.7658  | 15.59975 |
| 416.5 | 17.14372 | 15.45973 | 15.75644 | 15.43234 | 15.32299 | 15.61876 | 15.5102  |
| 417   | 16.98312 | 15.23796 | 15.6635  | 15.24061 | 15.17385 | 15.49931 | 15.40841 |
| 417.5 | 16.80421 | 14.86146 | 15.54177 | 14.91457 | 15.01499 | 15.2555  | 15.21073 |
| 418   | 16.61728 | 14.40044 | 15.36999 | 14.48404 | 14.8664  | 15.04291 | 14.86593 |
| 418.5 | 16.47677 | 14.36997 | 15.26067 | 14.45489 | 14.98855 | 14.72292 | 14.38453 |
| 419   | 16.34224 | 14.35492 | 15.15499 | 14.43947 | 14.7496  | 14.64353 | 14.35923 |
| 419.5 | 16.21367 | 14.35529 | 15.05295 | 14.43777 | 14.54955 | 14.40474 | 14.35047 |
| 420   | 16.09107 | 14.37107 | 14.95454 | 14.44979 | 14.5884  | 14.50655 | 14.35825 |

---

**Table.11. Changes in protein water solubility**

| H <sub>2</sub> O <sub>2</sub> (mmol/L) | Water solubility (g/100g) |        |        |
|----------------------------------------|---------------------------|--------|--------|
| 0                                      | 112.29                    | 117.51 | 114.40 |
| 0.1                                    | 89.28                     | 87.14  | 89.96  |
| 0.5                                    | 89.14                     | 88.86  | 89.97  |
| 1                                      | 100.25                    | 102.75 | 103.31 |
| 5                                      | 91.36                     | 94.97  | 95.81  |
| 10                                     | 86.36                     | 88.03  | 89.14  |
| 15                                     | 78.31                     | 78.31  | 79.97  |

**Table.12. Changes in protein EAI and ESI**

| H <sub>2</sub> O <sub>2</sub> (mmol/L) | EAI (m <sup>2</sup> /g) |       |       |       | ESI (min) |       |
|----------------------------------------|-------------------------|-------|-------|-------|-----------|-------|
| 0                                      | 28.98                   | 27.89 | 26.46 | 41.86 | 40.24     | 42.9  |
| 0.1                                    | 29.31                   | 27.87 | 27.33 | 41.97 | 44.1      | 44.07 |
| 0.5                                    | 27.63                   | 29.24 | 29.59 | 45.29 | 43.34     | 44.35 |
| 1                                      | 29.74                   | 30.98 | 31.35 | 41.93 | 45.12     | 43.79 |
| 5                                      | 32.3                    | 31.9  | 34.38 | 44.9  | 44.1      | 46.02 |
| 10                                     | 34.26                   | 33.85 | 36.08 | 44.34 | 46.44     | 44.05 |
| 15                                     | 36.38                   | 35.17 | 38.31 | 48.58 | 47.27     | 49.76 |

**Table.13. Changes in protein allergens content**

| H <sub>2</sub> O <sub>2</sub> (mmol/L) | Allergens content (ug/g) |       |       |
|----------------------------------------|--------------------------|-------|-------|
| 0                                      | 17.82                    | 19.05 | 17    |
| 0.1                                    | 17.05                    | 16.16 | 15.37 |
| 0.5                                    | 15.48                    | 16.63 | 14.88 |
| 1                                      | 14.99                    | 14.82 | 13.37 |
| 5                                      | 12.57                    | 10.66 | 11.99 |
| 10                                     | 5.7                      | 4.78  | 5.55  |
| 15                                     | 5.17                     | 4.47  | 5.47  |

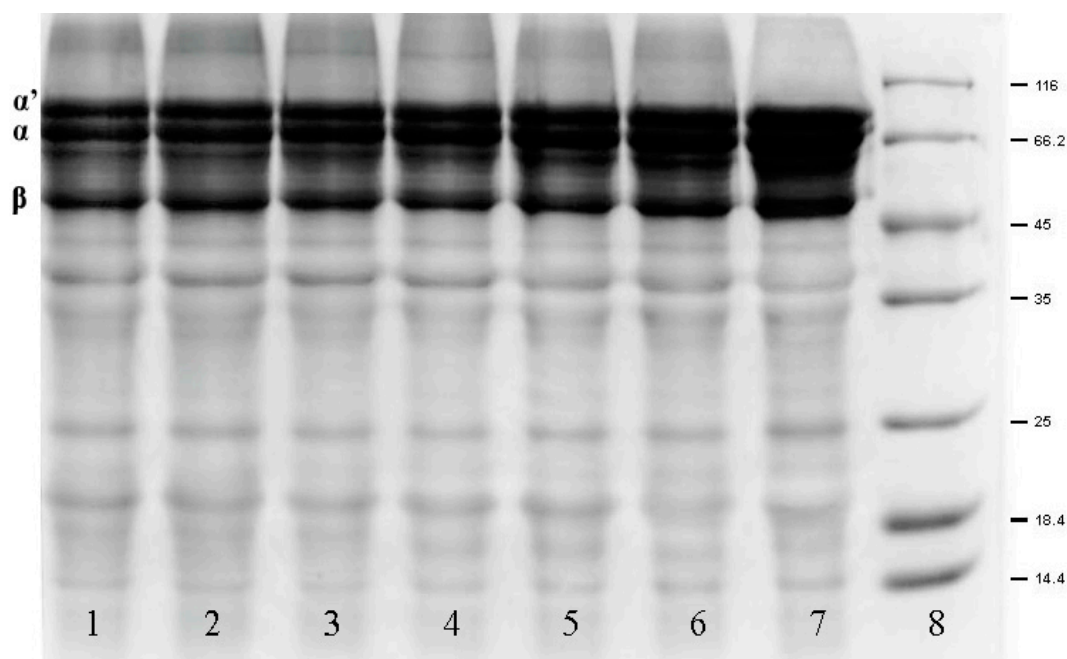

**Fig.** SDS-PAGE patterns of low molecular weight marker and oxidized β-conglycinin treated with different concentrations of H<sub>2</sub>O<sub>2</sub> for 3h at 20 °C. α, α', and β bands showed the changes in three subunits of β-conglycinin. (Lane 1, 15 mmol/L H<sub>2</sub>O<sub>2</sub>; Lane 2, 10 mmol/L H<sub>2</sub>O<sub>2</sub>; Lane 3, 5 mmol/L H<sub>2</sub>O<sub>2</sub>; Lane 4, 1 mmol/L H<sub>2</sub>O<sub>2</sub>; Lane 5, 0.5 mmol/L H<sub>2</sub>O<sub>2</sub>; Lane 6, 0.1 mmol/L H<sub>2</sub>O<sub>2</sub>; Lane 7, 0 mmol/L H<sub>2</sub>O<sub>2</sub>;

Lane 7,  $\beta$ -conglycinin; Lane 8, low molecular weight marker) The molecular weights of markers are 14.4 kDa, 18.4 kDa, 25.0 kDa, 35.0 kDa, 45.0 kDa, 66.2 kDa, and 116.0 kDa, respectively.
